# Supplementary material
Source: PubMed Central journal article supplement (PMC2890761)
Supplement: 1000576107_pnas.201000576SI.pdf [file 1000576107_pnas.201000576SI.pdf]

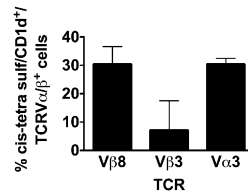

**Fig. 54.** Hepatic MNCs stained with CD1d-tetramers loaded with a single immunodominant cis-tetracosenoyl sulfatide also predominantly use TCR Vβ8, Vβ3, and Vα3 chains. Liver MNCs from Jα18<sup>-/-</sup> mice were analyzed by flow cytometry following staining with cis-tetracosenoyl sulfatide/CD1d-tetramer and respective antibodies against Vβ8, Vβ3, and Vα3 chains. Percentage was calculated in relation to total cis-tetracosenoyl sulfatide/CD1d-tetramer<sup>+</sup>TCRα/β<sup>+</sup> cells after subtraction of background (unloaded CD1d-tetramer). Data are representative of two individual experiments.

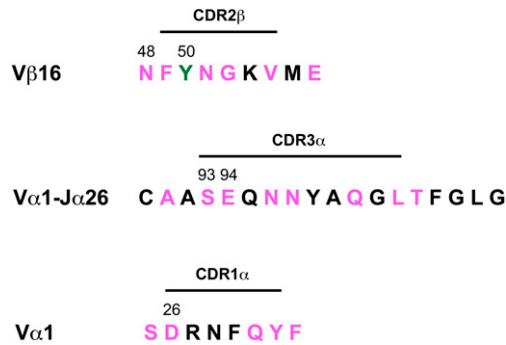

**Fig. 55.** CDR2β, CDR3α, and CDR1α regions of the lyso-sulfatide-reactive hybridoma Hy19.3 are similar to those of sulfatide/CD1d-tetramer<sup>+</sup> cells. The amino acid sequence of the Vα1-Jα26/Vβ16-Jβ2.1 TCR used by Hy19.3 is depicted. Conserved tyrosine residue between type I and type II NKT cells is shown in green. Residues identical or similar to the sulfatide/CD1d-tetramer<sup>+</sup> cells (Fig. 3B) are depicted in purple.
